# Supplementary material
Source: publisher site journal article supplement (https://www.dovepress.com/article/499446)
Supplement: Supplementary file 1 [file get_supplementary_file.php]

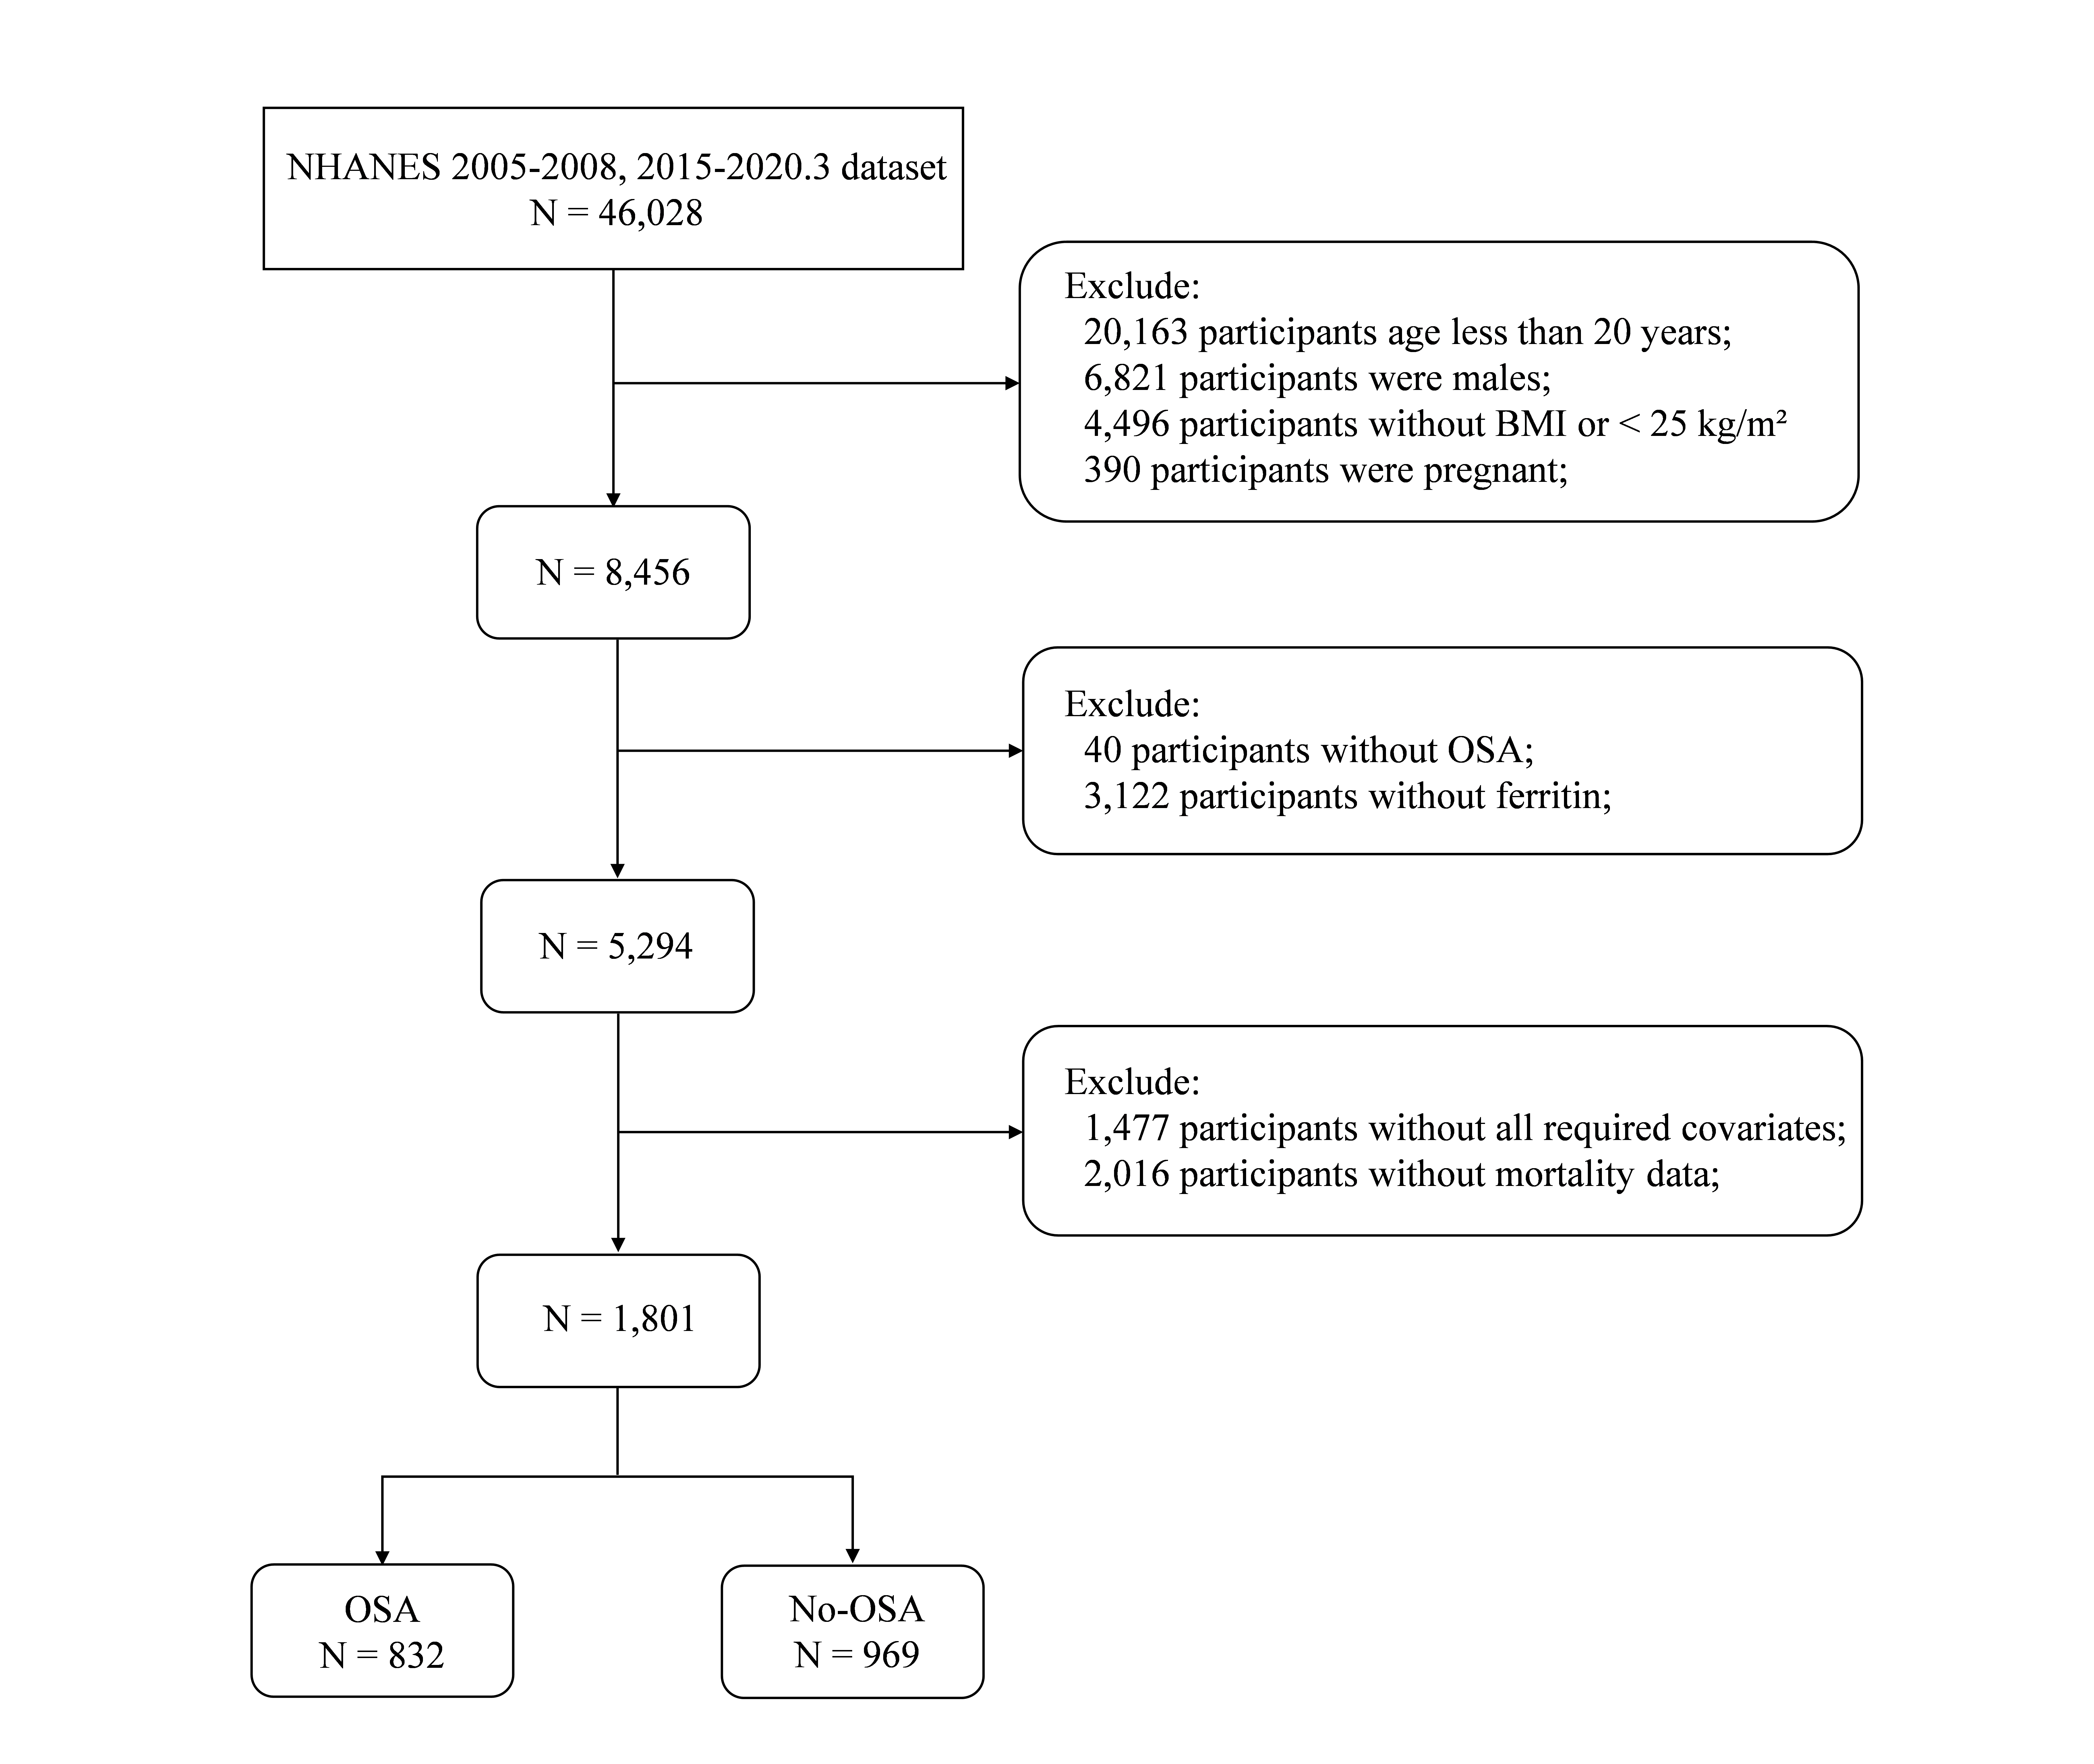


**Supplementary Figure 1** Flow chart of participants' enrollment process in the prospective study.


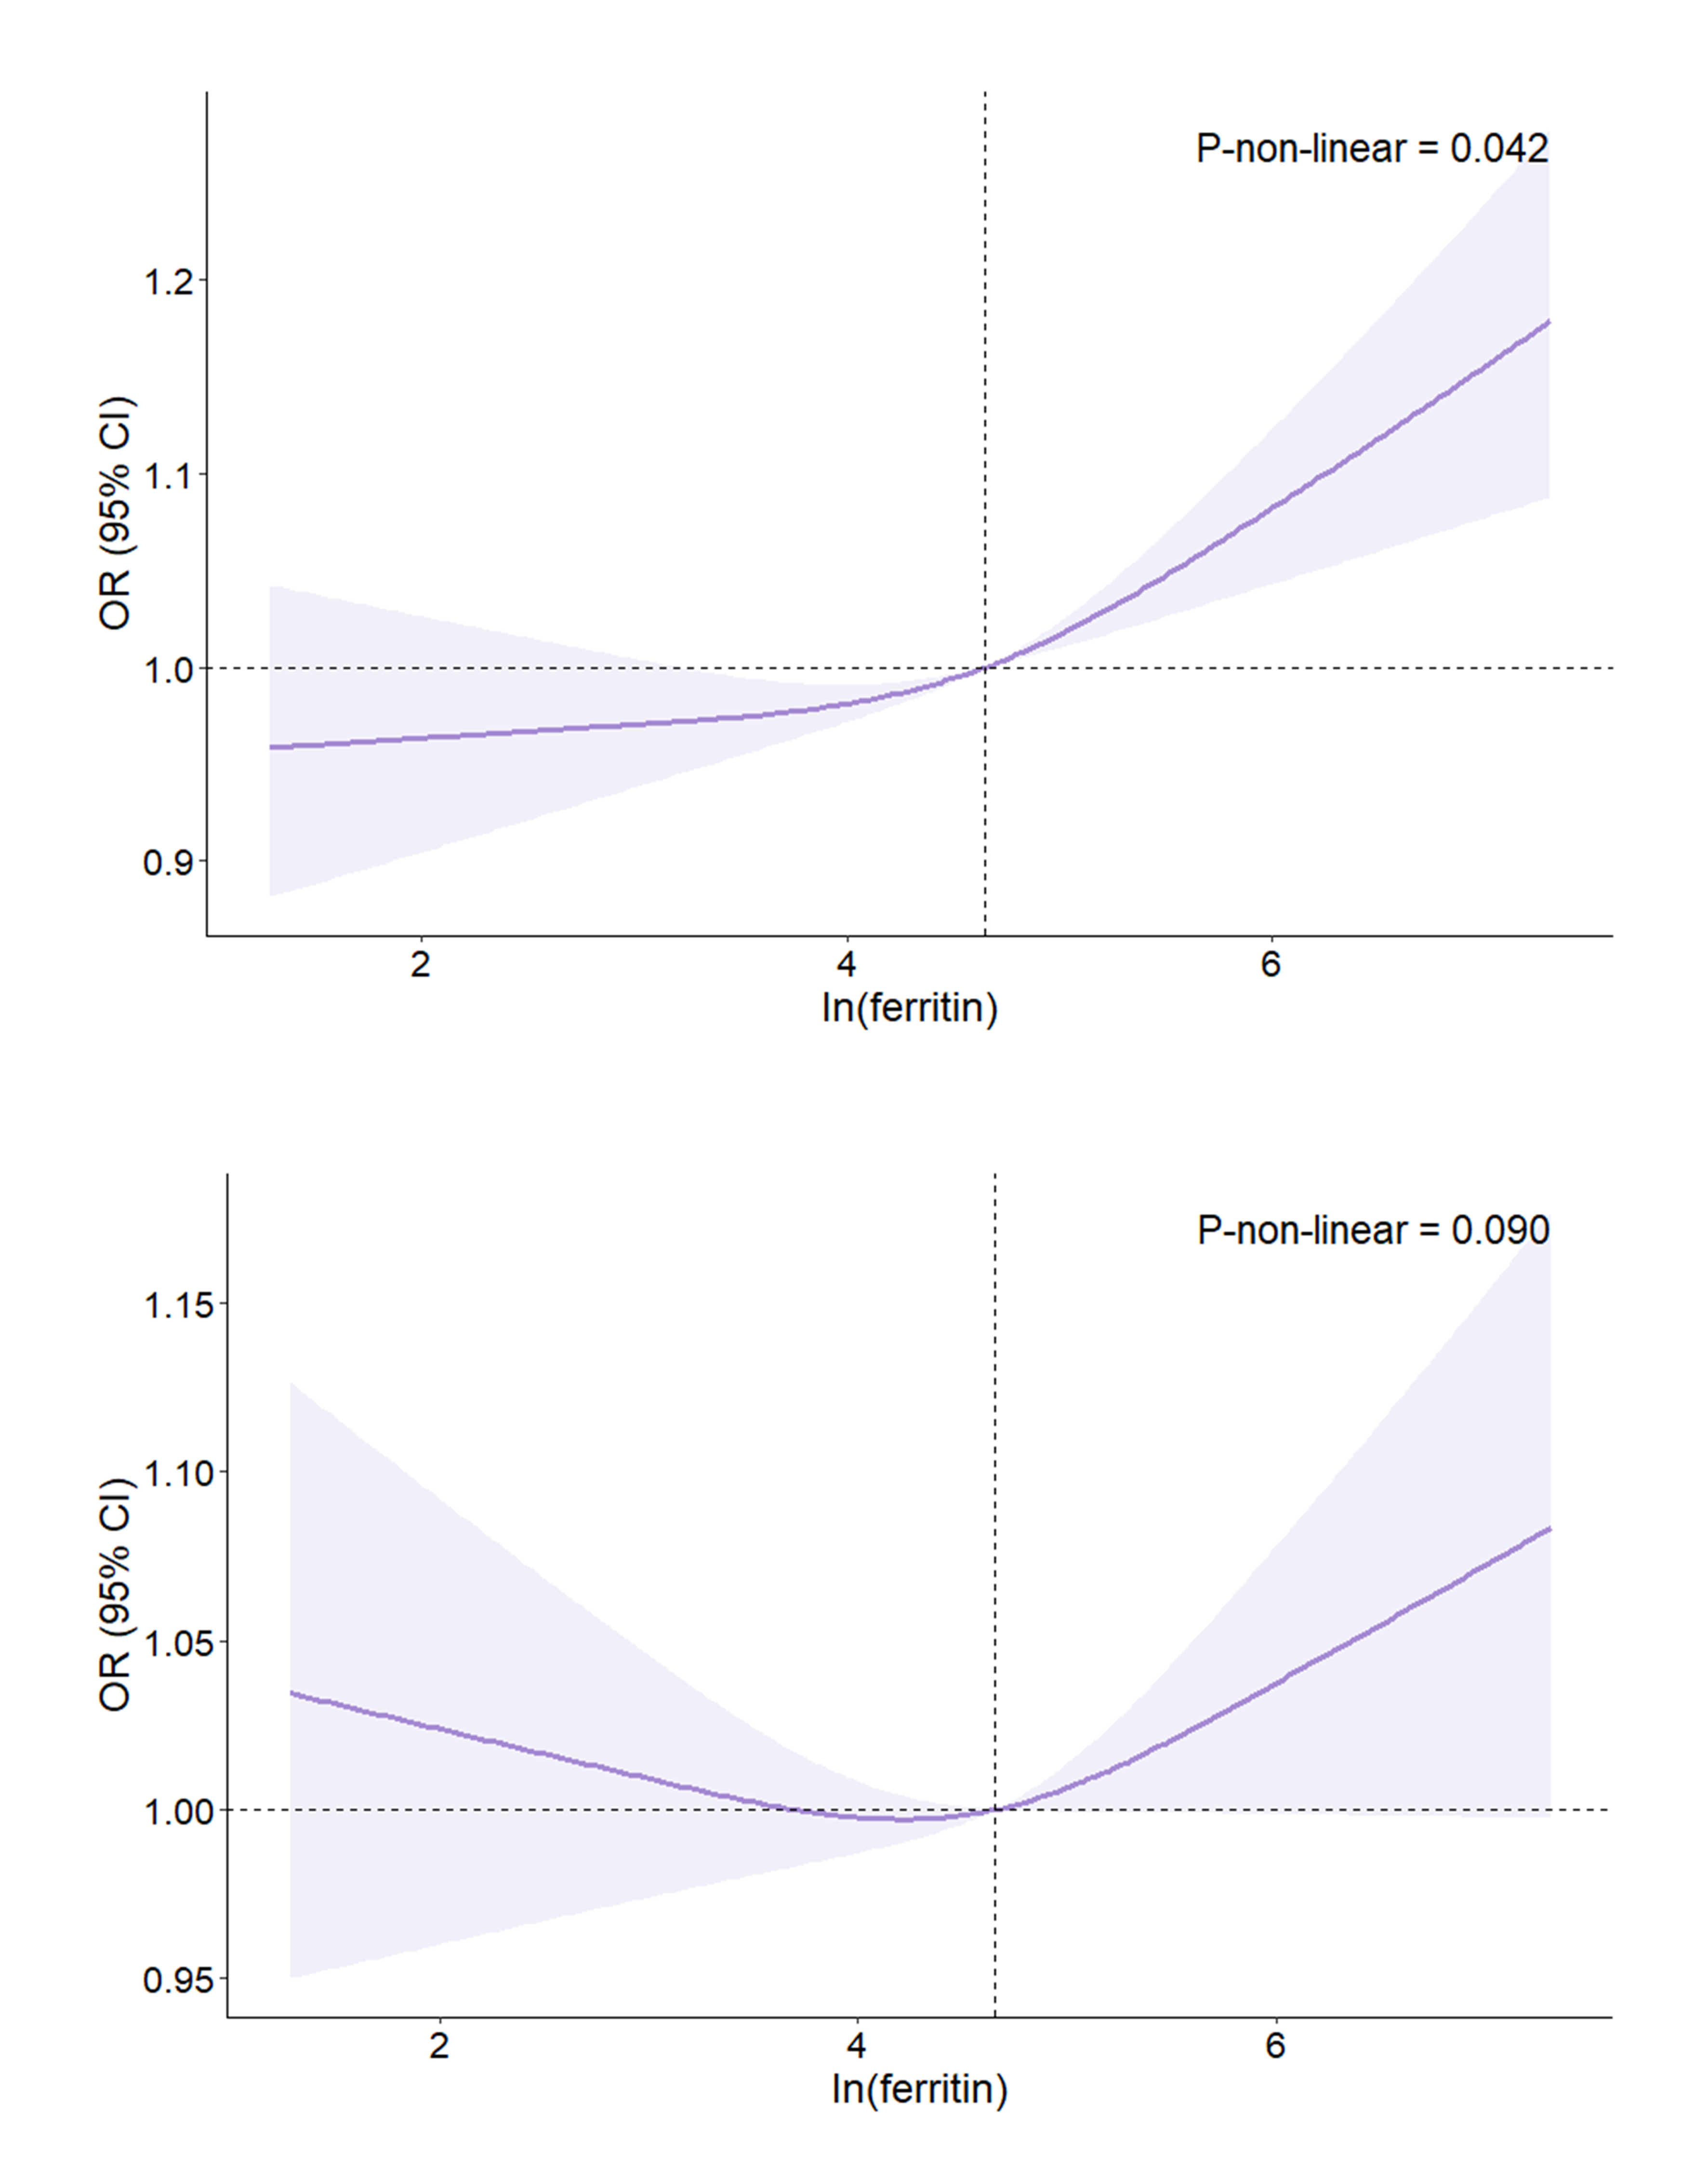


B

A

**Supplementary Figure 2** Odds ratio of OSA according to ln-transformed ferritin levels in overweight/obese people. (A) No covariates. (B) Adjusted for Age, Gender, Race, BMI, and PIR.

**
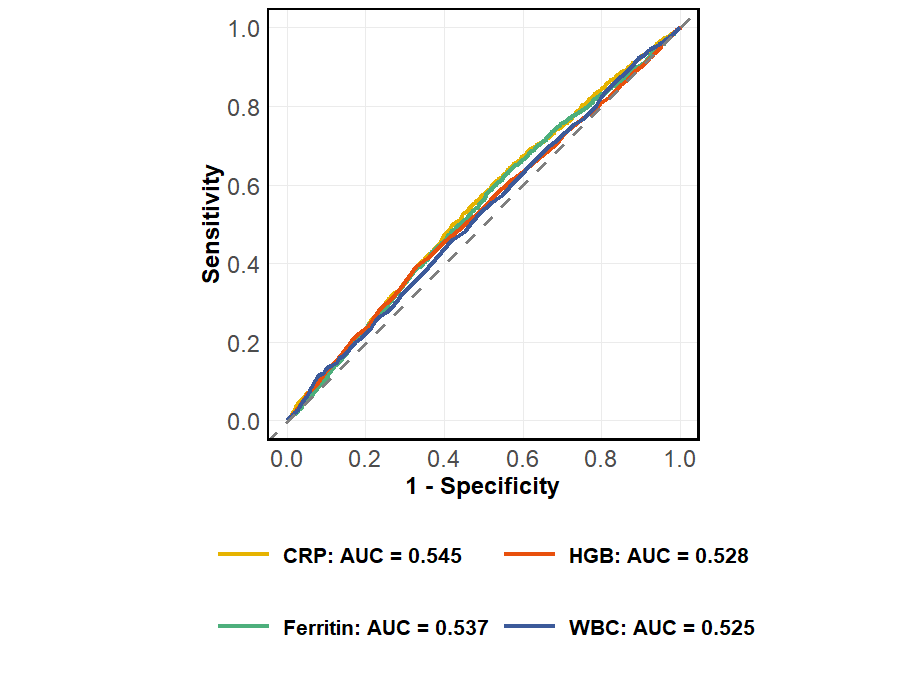
**

**Supplementary Figure 3** Predictive ability of Ferritin, HGB, WBC and CRP for OSA in four ROC curves.

**
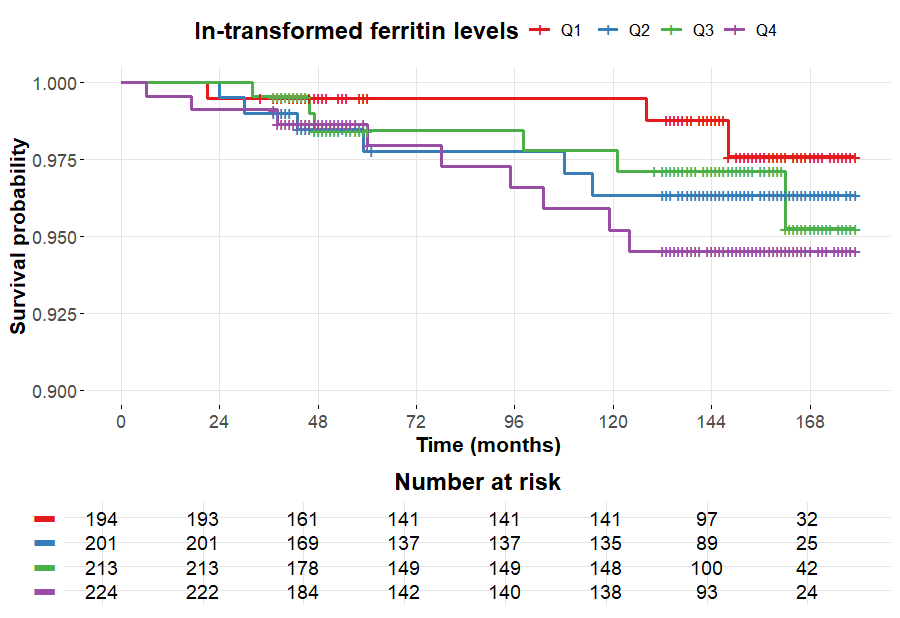
**

**Supplementary Figure 4** Kaplan-Meier curves across groups with different ferritin levels for all-cause mortality.

**Supplementary Table 1** Characteristics of the study population according to OSA in the cross-sectional study.

| Characteristic | Total, N = 4809 (100%) | No OSA, N = 2202 (46%) | OSA, N = 2607 (54%) | P-value |
| --- | --- | --- | --- | --- |
| Age (years) |  |  |  | <0.001 |
| 20-40 years | 1,456 (34%) | 792 (39%) | 664 (30%) |  |
| 40-60 years | 1,675 (37%) | 641 (33%) | 1,034 (41%) |  |
| 60+ years | 1,678 (29%) | 769 (28%) | 909 (30%) |  |
| Gender, n (%) |  |  |  | <0.001 |
| Female | 2,626 (53%) | 1,285 (58%) | 1,341 (49%) |  |
| Male | 2,183 (47%) | 917 (42%) | 1,266 (51%) |  |
| Race, n (%) |  |  |  | 0.700 |
| Mexican American | 698 (9.6%) | 313 (9.7%) | 385 (9.5%) |  |
| Other Hispanic | 510 (7.1%) | 206 (6.5%) | 304 (7.6%) |  |
| Non-Hispanic White | 1,838 (66%) | 866 (66%) | 972 (65%) |  |
| Non-Hispanic Black | 1,230 (11%) | 568 (11%) | 662 (10%) |  |
| Other/multiracial | 533 (7.2%) | 249 (7.3%) | 284 (7.1%) |  |
| BMI |  |  |  | <0.001 |
| Overweight (25-30 kg/m2) | 1,951 (41%) | 1,025 (49%) | 926 (35%) |  |
| Class I Obesity (30-35 kg/m2) | 1,406 (30%) | 648 (28%) | 758 (32%) |  |
| Class II Obesity (35-40 kg/m2) | 790 (16%) | 312 (13%) | 478 (18%) |  |
| Class III Obesity (≥40 kg/m2) | 662 (13%) | 217 (9.5%) | 445 (16%) |  |
| PIR, n (%) |  |  |  | 0.130 |
| Low (<1.3) | 1,320 (18%) | 606 (17%) | 714 (19%) |  |
| Medium (1.3-3.5) | 1,925 (36%) | 859 (33%) | 1,066 (37%) |  |
| High (≥3.5) | 1,564 (46%) | 737 (49%) | 827 (44%) |  |
| Alcohol, n (%) | 2,123 (50%) | 950 (49%) | 1,173 (51%) | 0.500 |
| Smoking, n (%) |  |  |  | <0.001 |
| Former | 1,297 (29%) | 555 (26%) | 742 (31%) |  |
| Never | 2,691 (55%) | 1,307 (60%) | 1,384 (51%) |  |
| Now | 821 (16%) | 340 (14%) | 481 (18%) |  |
| Sedentary time, n (%) |  |  |  | 0.200 |
| < 3 h/d | 719 (12%) | 356 (13%) | 363 (10%) |  |
| 3-6 h/d | 1,784 (36%) | 820 (36%) | 964 (35%) |  |
| ≥ 6 h/d | 2,306 (53%) | 1,026 (51%) | 1,280 (54%) |  |
| CVD, n (%) | 407 (7.0%) | 176 (6.7%) | 231 (7.3%) | 0.400 |
| Diabetes, n (%) | 791 (13%) | 295 (11%) | 496 (15%) | <0.001 |
| Hypertension, n (%) | 1,947 (36%) | 767 (30%) | 1,180 (40%) | <0.001 |
| WBC (1000 cells/uL) | 7.20 (6.00, 8.70) | 7.10 (5.90, 8.60) | 7.40 (6.10, 8.80) | 0.01 |
| HGB (g/dL) | 14.30 (13.30, 15.20) | 14.18 (13.30, 15.10) | 14.40 (13.40, 15.30) | 0.006 |
| HCT (%) | 42.3 (39.7, 44.8) | 41.9 (39.5, 44.5) | 42.6 (40.0, 45.0) | 0.006 |
| RDW (%) | 13.50 (13.00, 14.10) | 13.40 (13.00, 14.10) | 13.50 (13.00, 14.10) | 0.13 |
| HDL (mg/dL) | 49 (41, 59) | 51 (42, 60) | 48 (40, 57) | <0.001 |
| TC（mg/dL） | 186 (161, 214) | 184 (160, 213) | 188 (162, 216) | 0.11 |
| CRP (mg/L) | 2.5 (1.1, 5.2) | 2.2 (1.0, 4.6) | 2.8 (1.1, 5.5) | 0.002 |
| Total iron (mg/d) | 12 (9, 17) | 12 (8, 17) | 12 (9, 17) | 0.046 |
| ln-ferritin | 4.66 (3.93, 5.26) | 4.52 (3.85, 5.17) | 4.75 (4.02, 5.35) | <0.001 |

Abbreviations: BMI: Body mass index; CVD: Cardiovascular disease; CRP: C-reactive protein; HCT: Hematocrit; HDL: High-Density Lipoprotein; HGB: Hemoglobin; ln-ferritin: ln-transformed ferritin; OSA: obstructive sleep apnea; RDW: Red cell distribution width; PIR: Family poverty income ratio; TC: Total Cholesterol; WBC: White blood cell.

**Supplementary Table 2** Association between ferritin and three different definitions of OSA.

| Variables |  | Question 1 | |  | Question 2 | |  | Question 3 | |  |
| --- | --- | --- | --- | --- | --- | --- | --- | --- | --- | --- |
|  | OR (95% CI) | P-value |  | OR (95% CI) | P-value |  | OR (95% CI) | P-value |  |
| Q1 group |  | 1.15 (0.91, 1.45) | 0.200 |  | 1.16 (0.86, 1.58) | 0.300 |  | 1.03 (0.61, 1.75) | 0.900 |  |
| Q2 group |  | Reference |  |  | Reference |  |  | Reference |  |  |
| Q3 group |  | 1.22 (0.92, 1.62) | 0.150 |  | 1.35 (1.06, 1.72) | 0.017 |  | 0.97 (0.56, 1.66) | 0.900 |  |
| Q4 group |  | 1.31 (0.99, 1.73) | 0.056 |  | 1.63 (1.06, 2.49) | 0.028 |  | 0.90 (0.39, 2.06) | 0.800 |  |
| P for trend |  | < 0.001 |  |  | 0.001 |  |  | 0.173 |  |  |

Question 1: “Do you snore for 3 or more nights per week?”.

Question 2: “Do you experience snorting, gasping, or stopping breathing for 3 or more nights per week?”.

Question 3: “Do you feel excessively sleepy during the day, ranging from 16 to 30 times per month, despite getting around 7 or more hours of sleep per night on weekdays or work nights?”.

All covariates in Model 2 were adjusted.
